# Supplementary material for: Genome-wide analyses of cassava Pathogenesis-related (PR) gene families reveal core transcriptome responses to whitefly infestation, salicylic acid and jasmonic acid
Source: PubMed Central journal article supplement (PMC6990599; doi:10.1186/s12864-019-6443-1), 2020-01-29

# PR-1

PR-1c3

Potri.006G171300

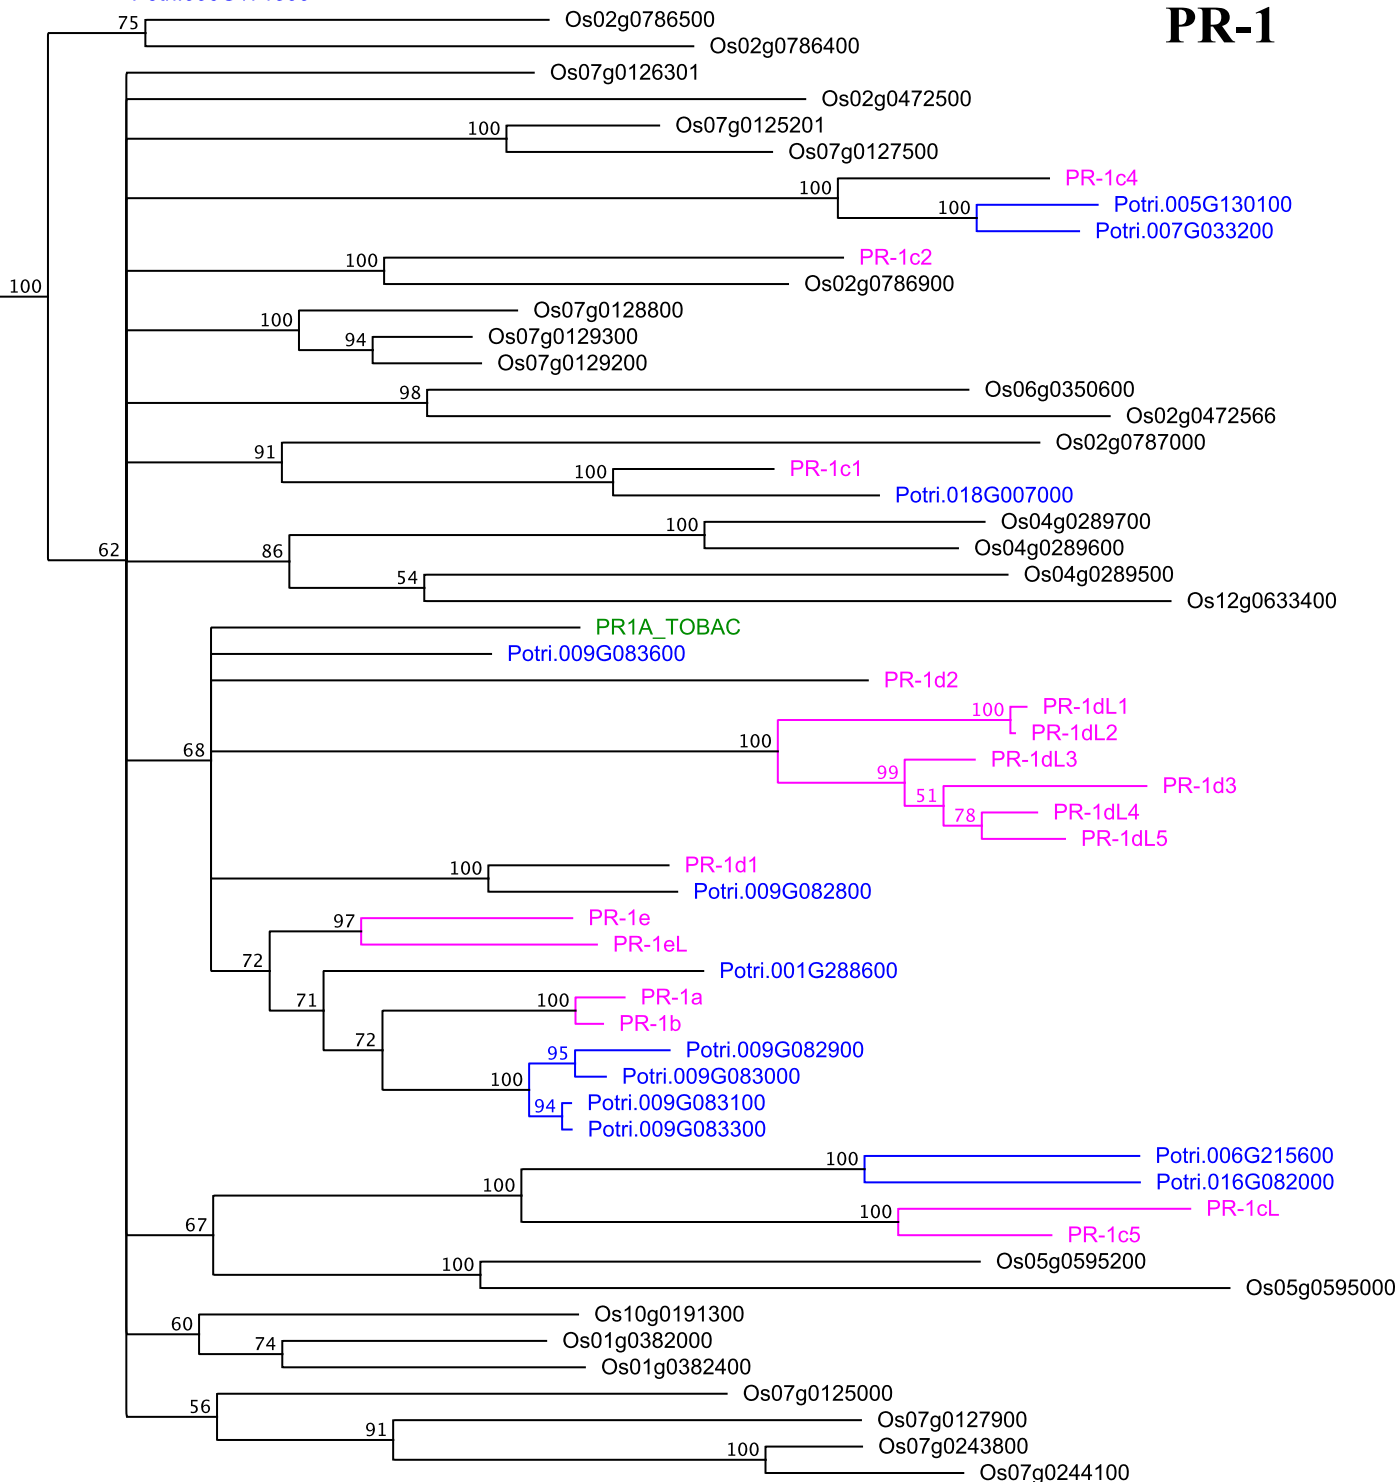

0.2

PR-2

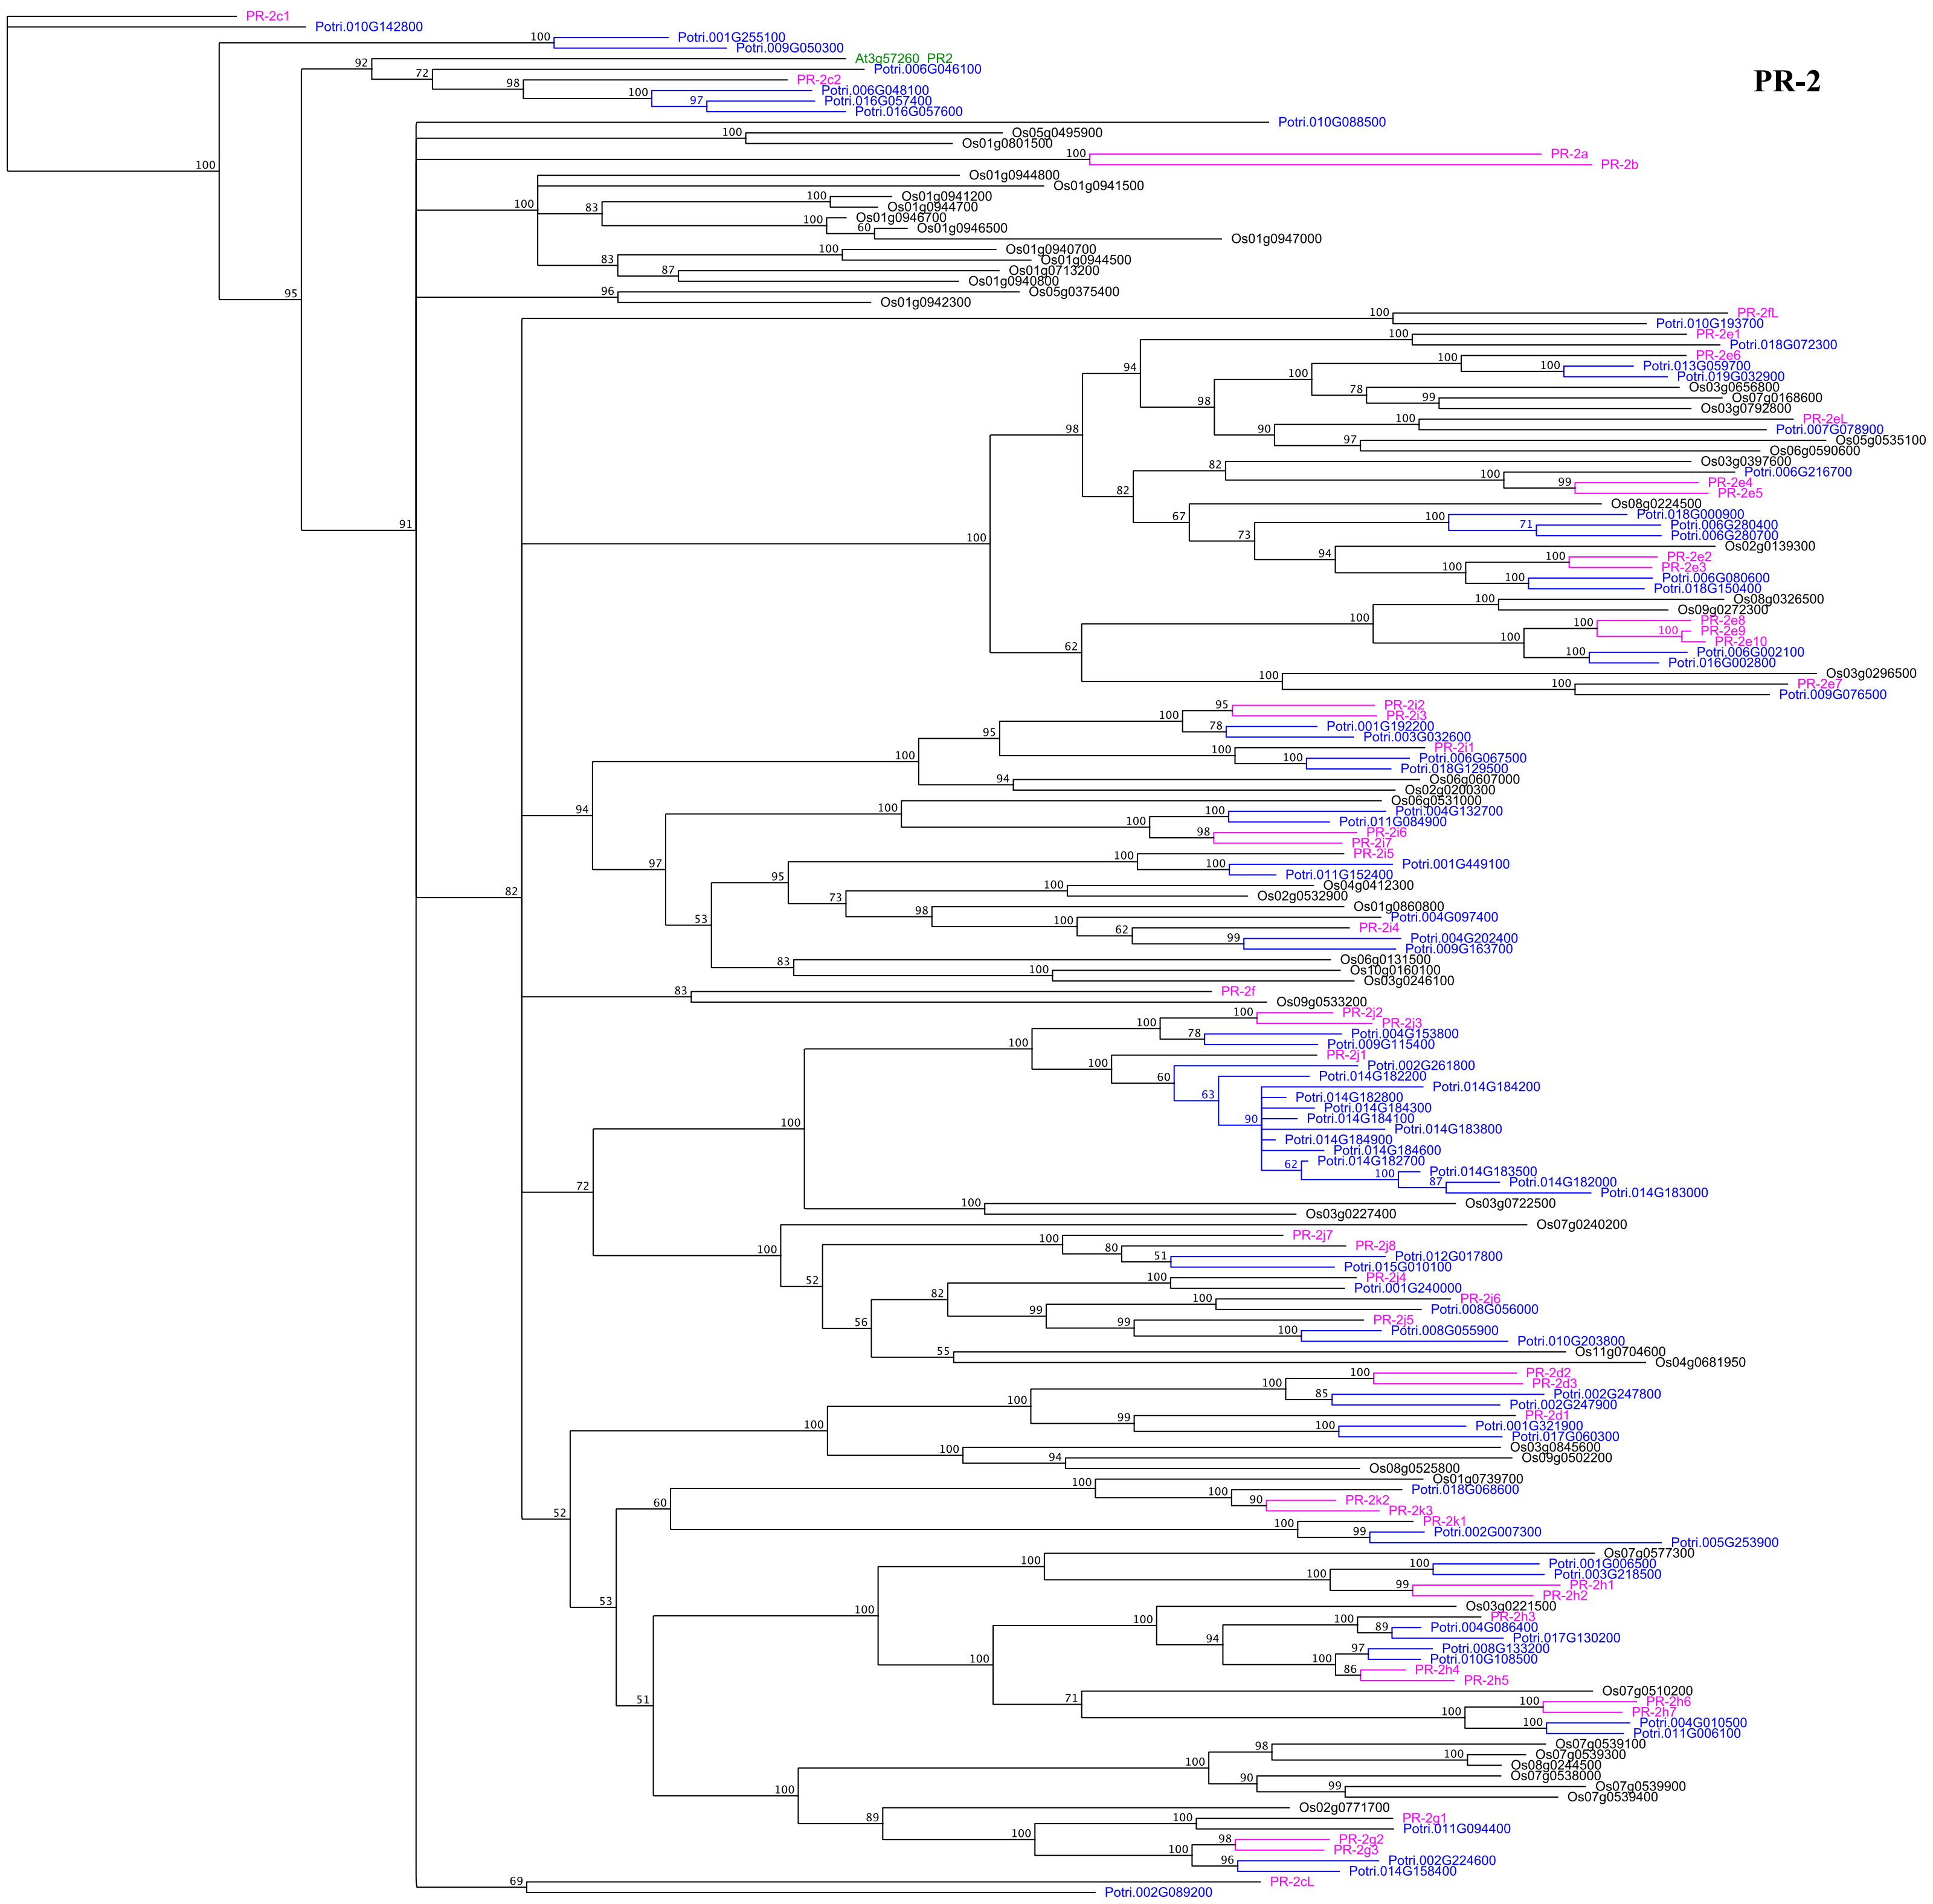

# PR-3

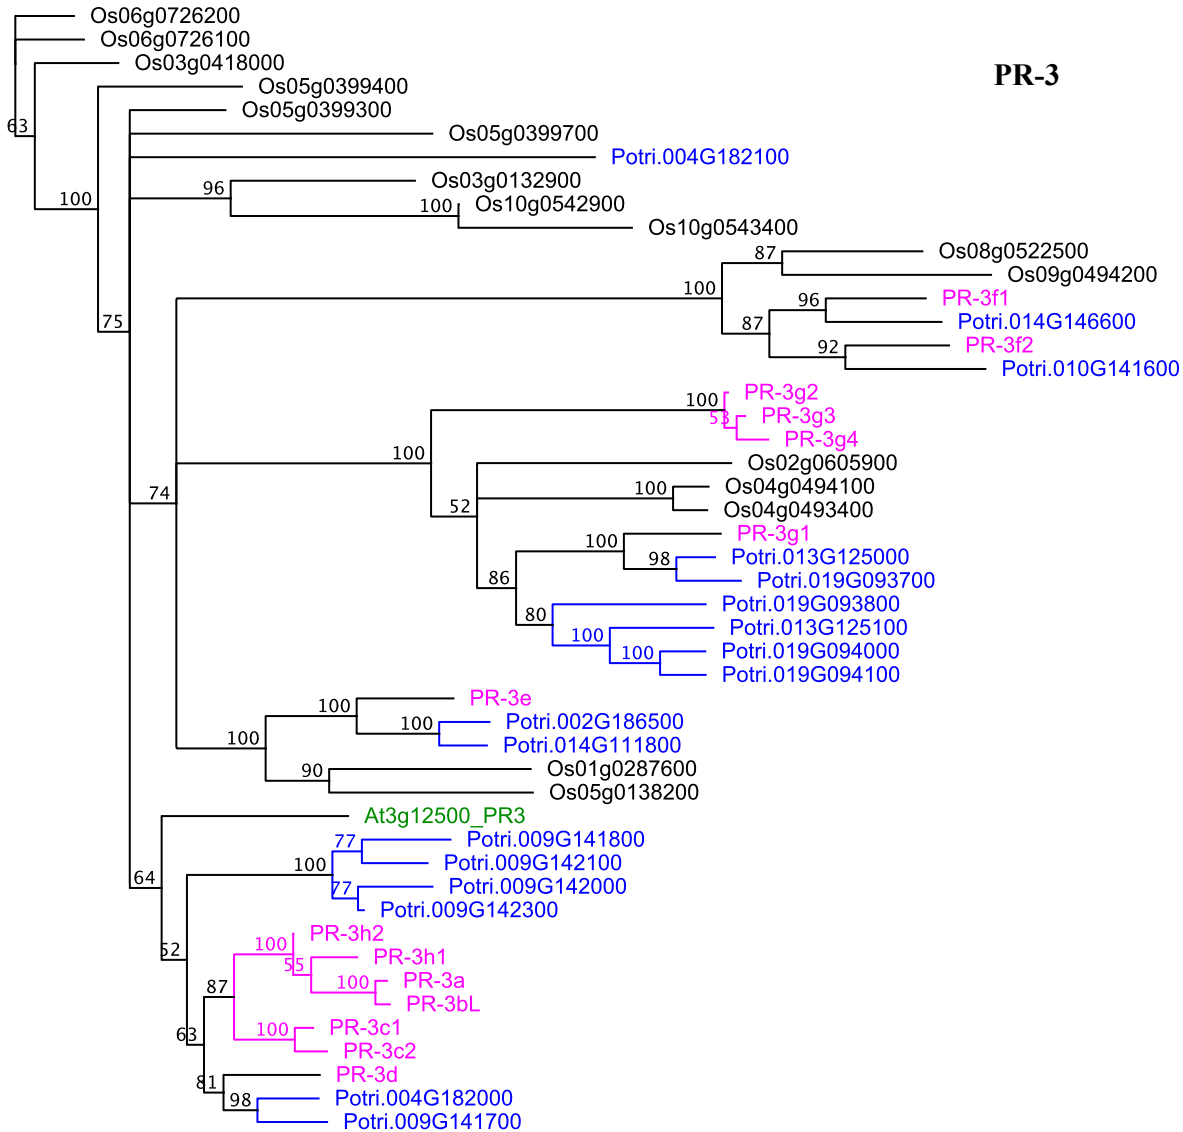

0.2

# PR-4

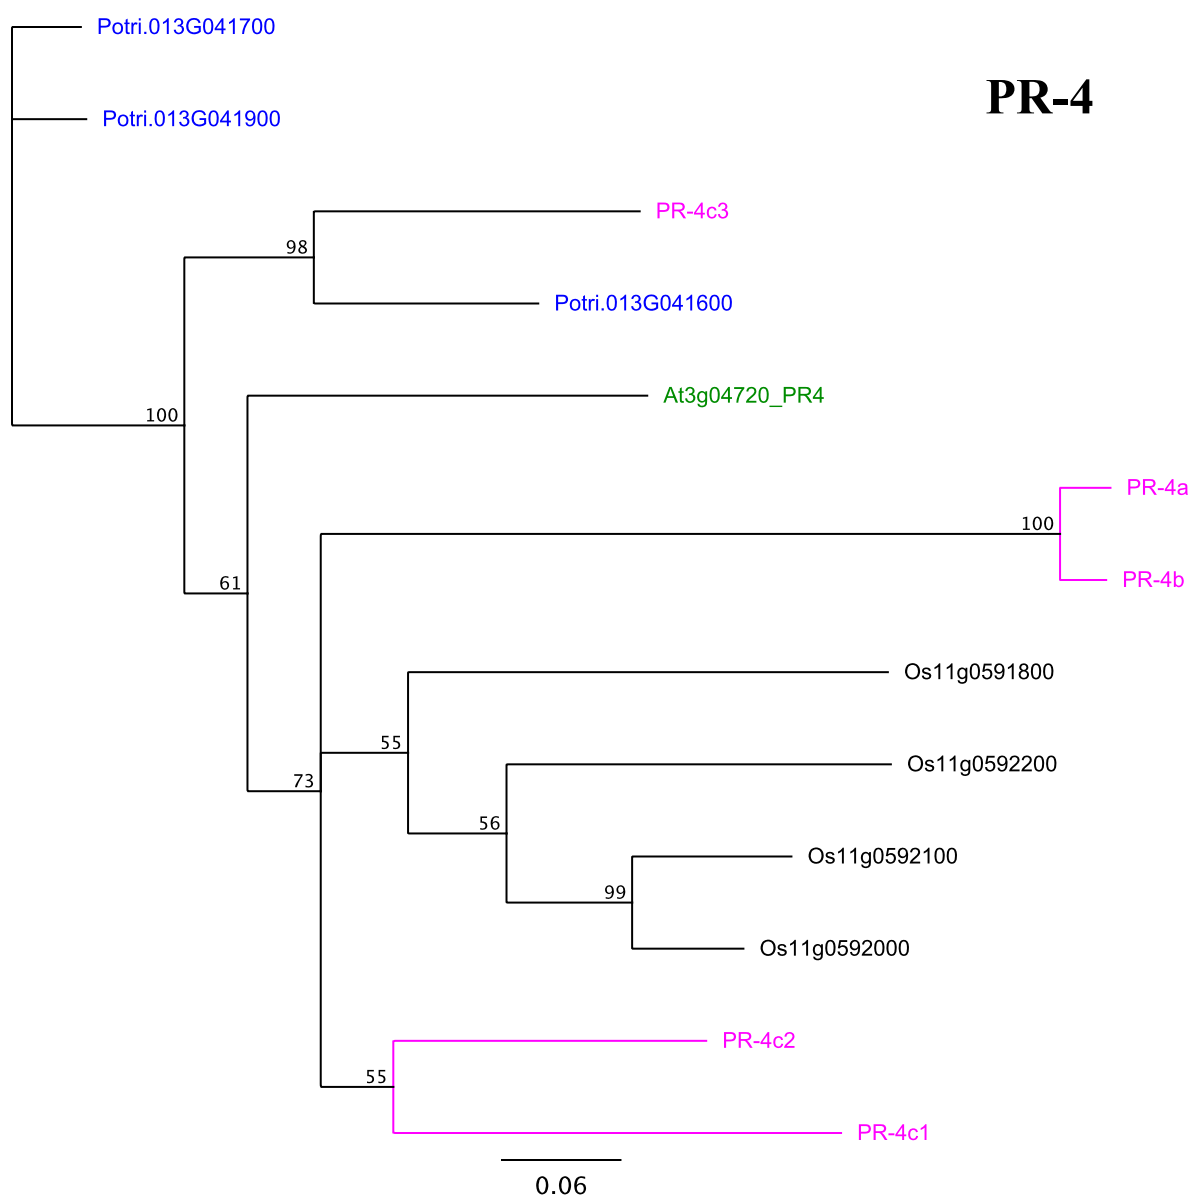

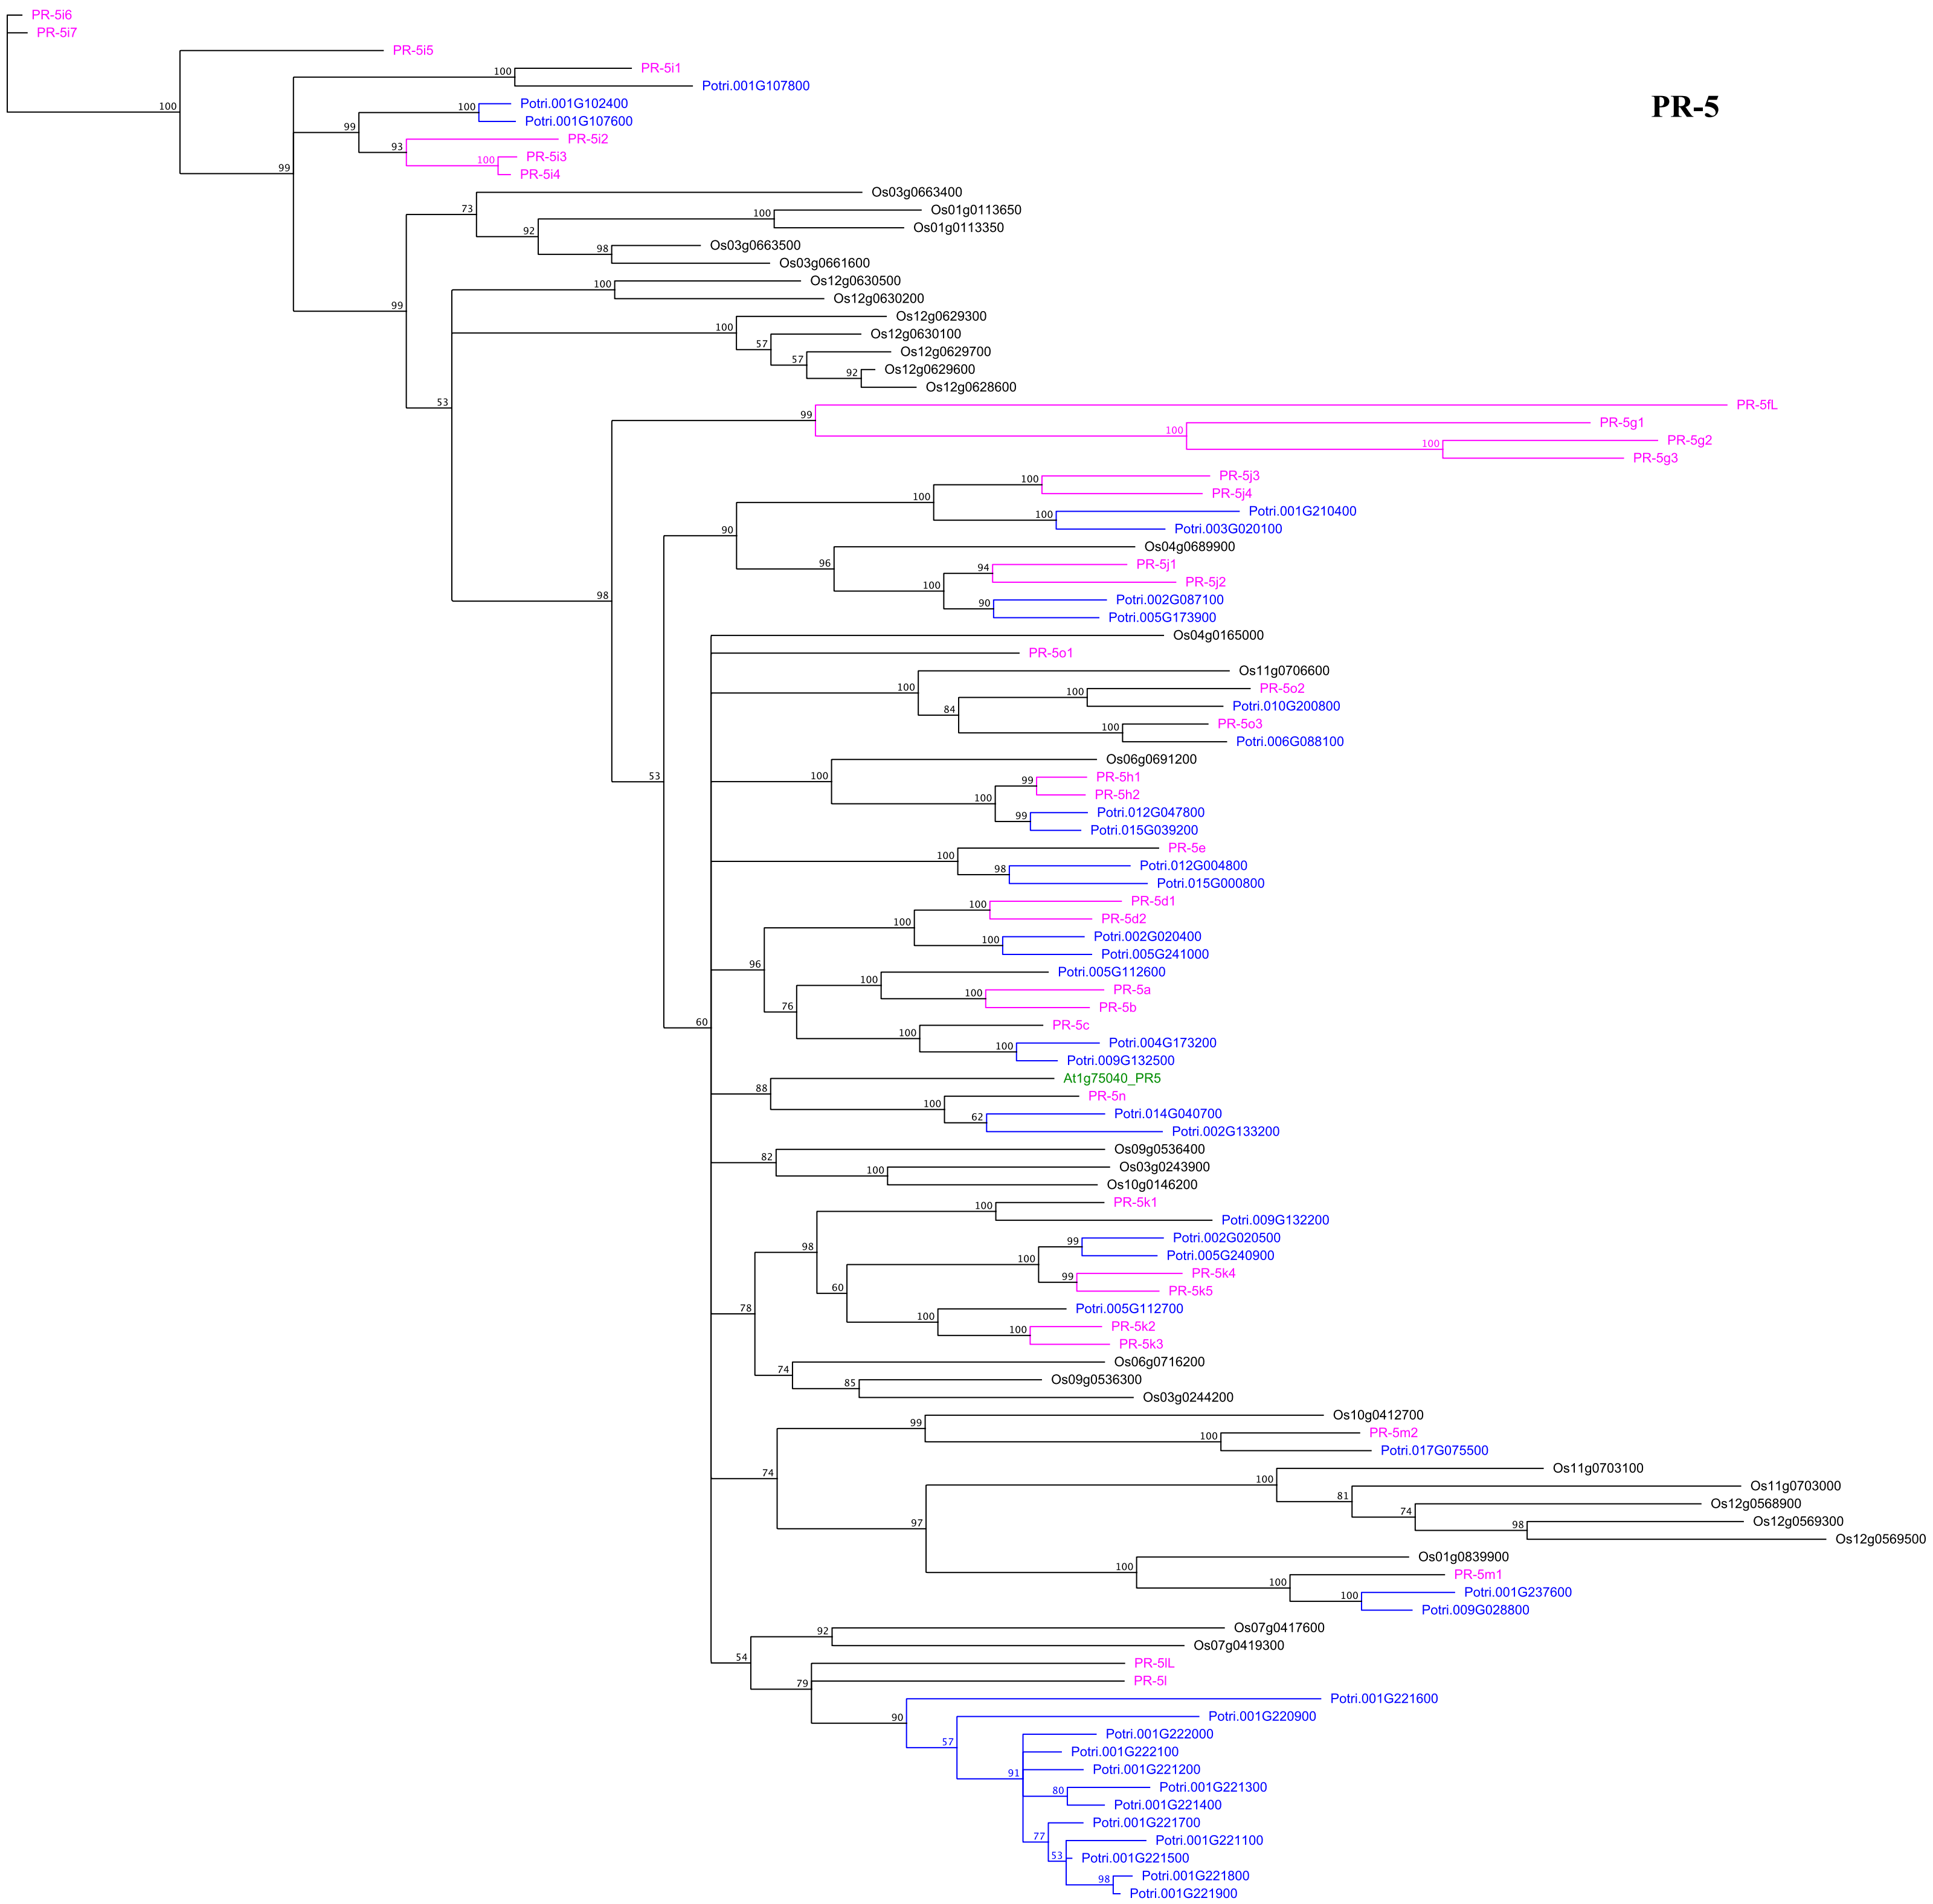

**PR-6**

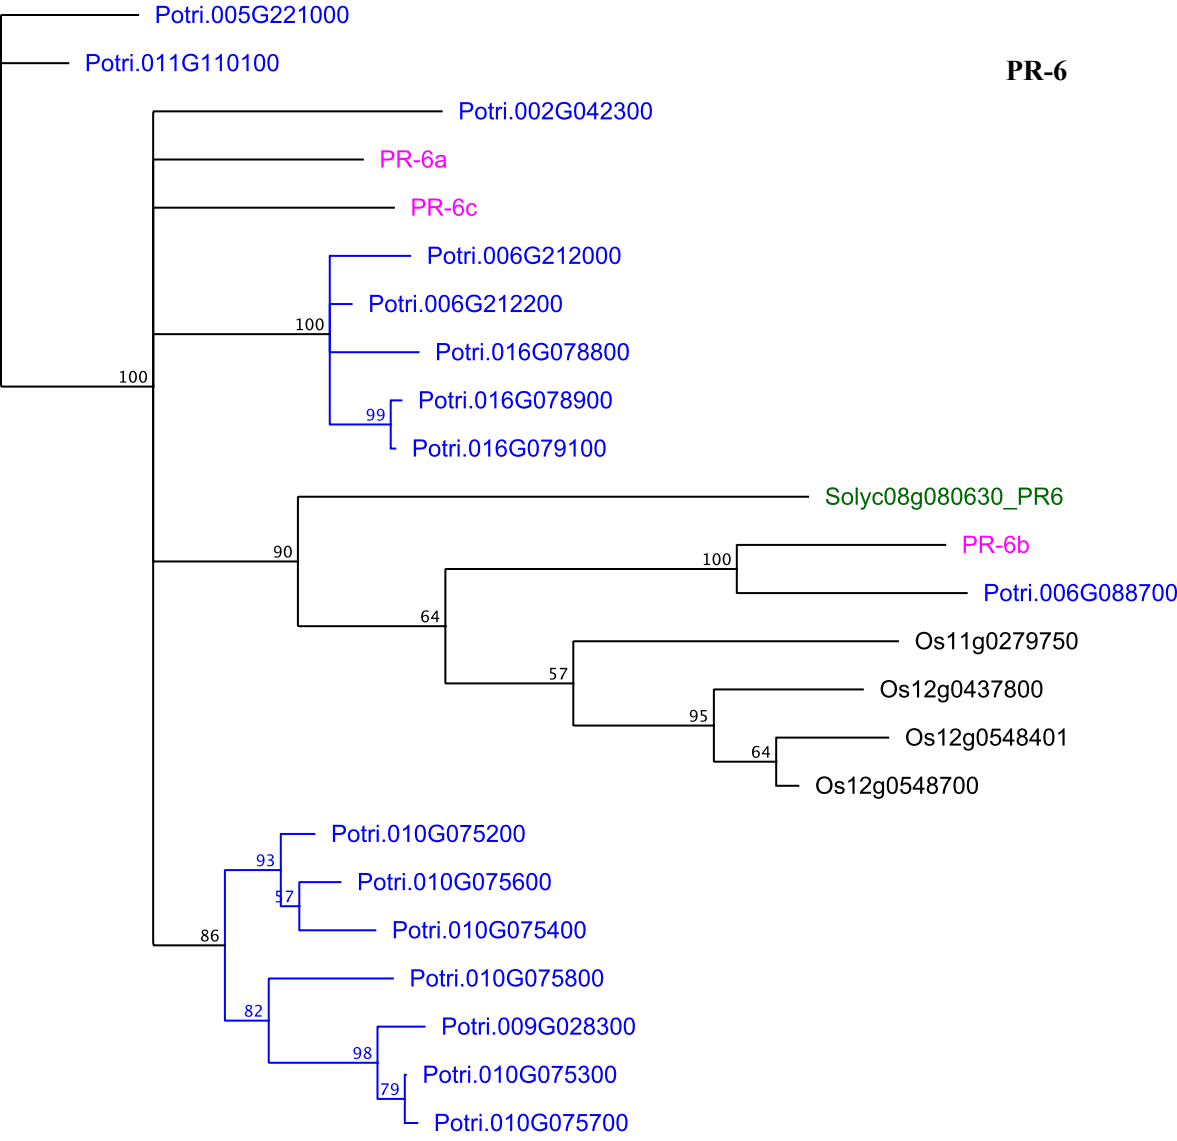

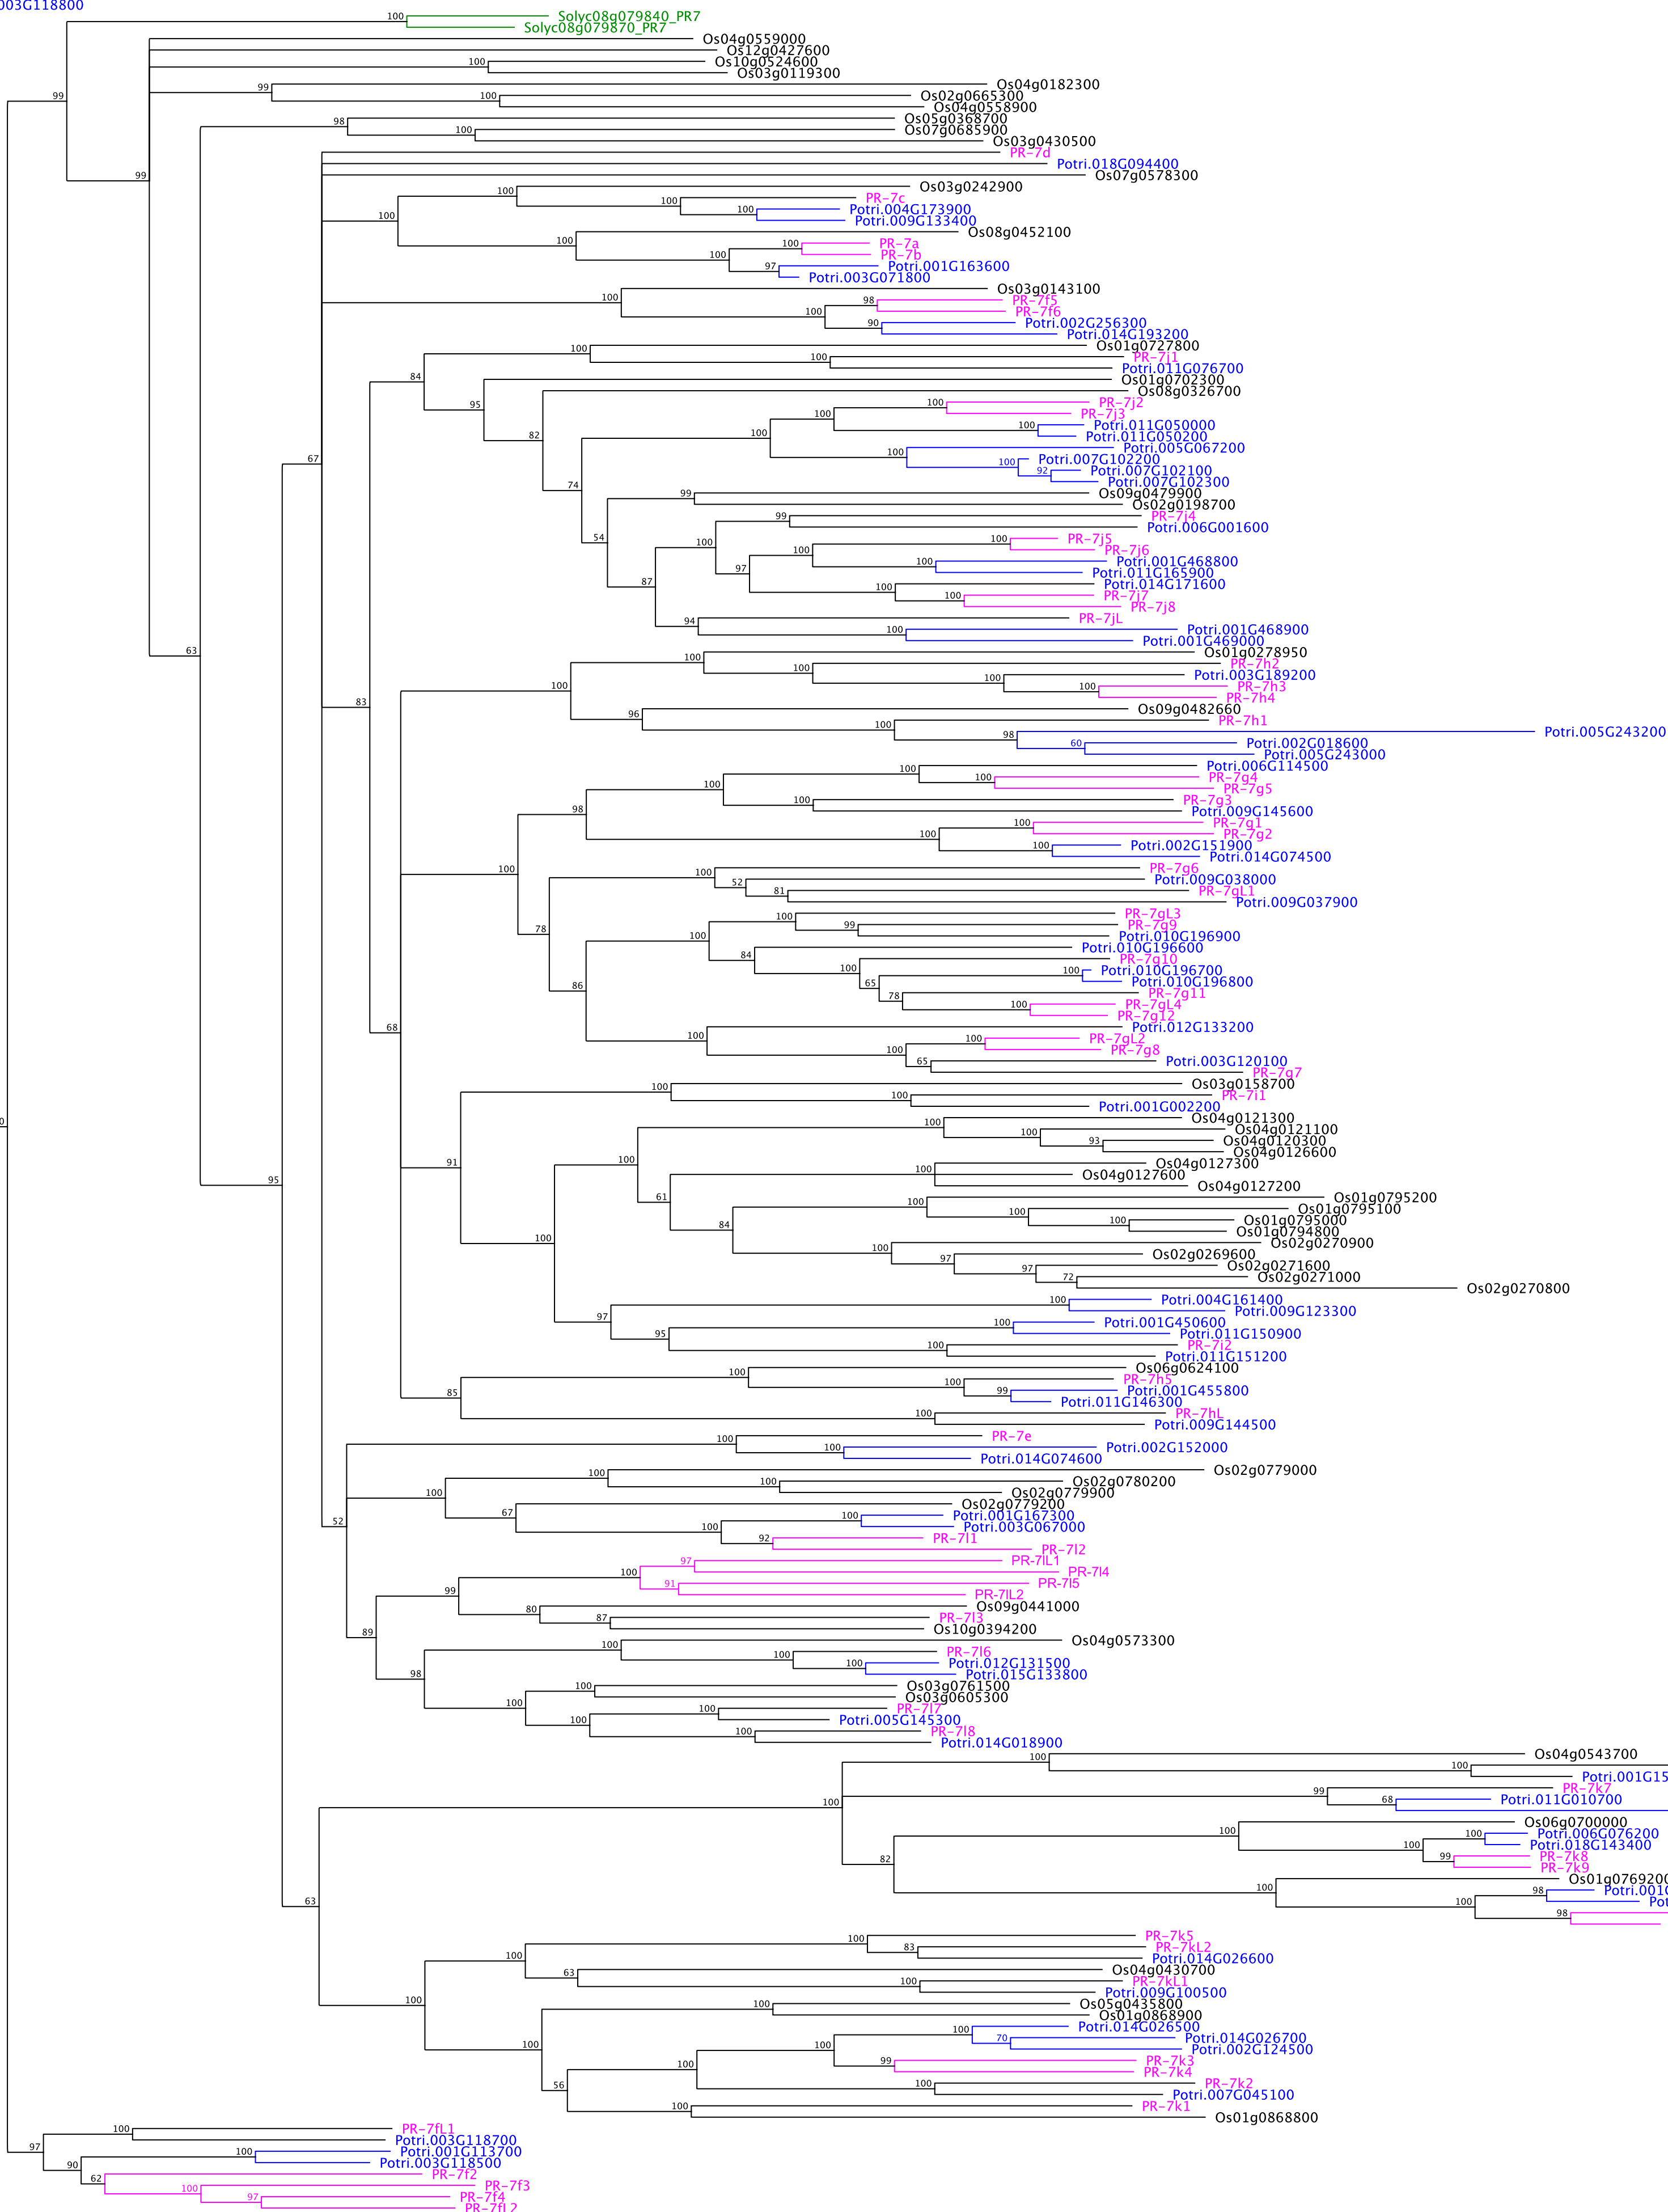

Potri.004G005000

# PR-8

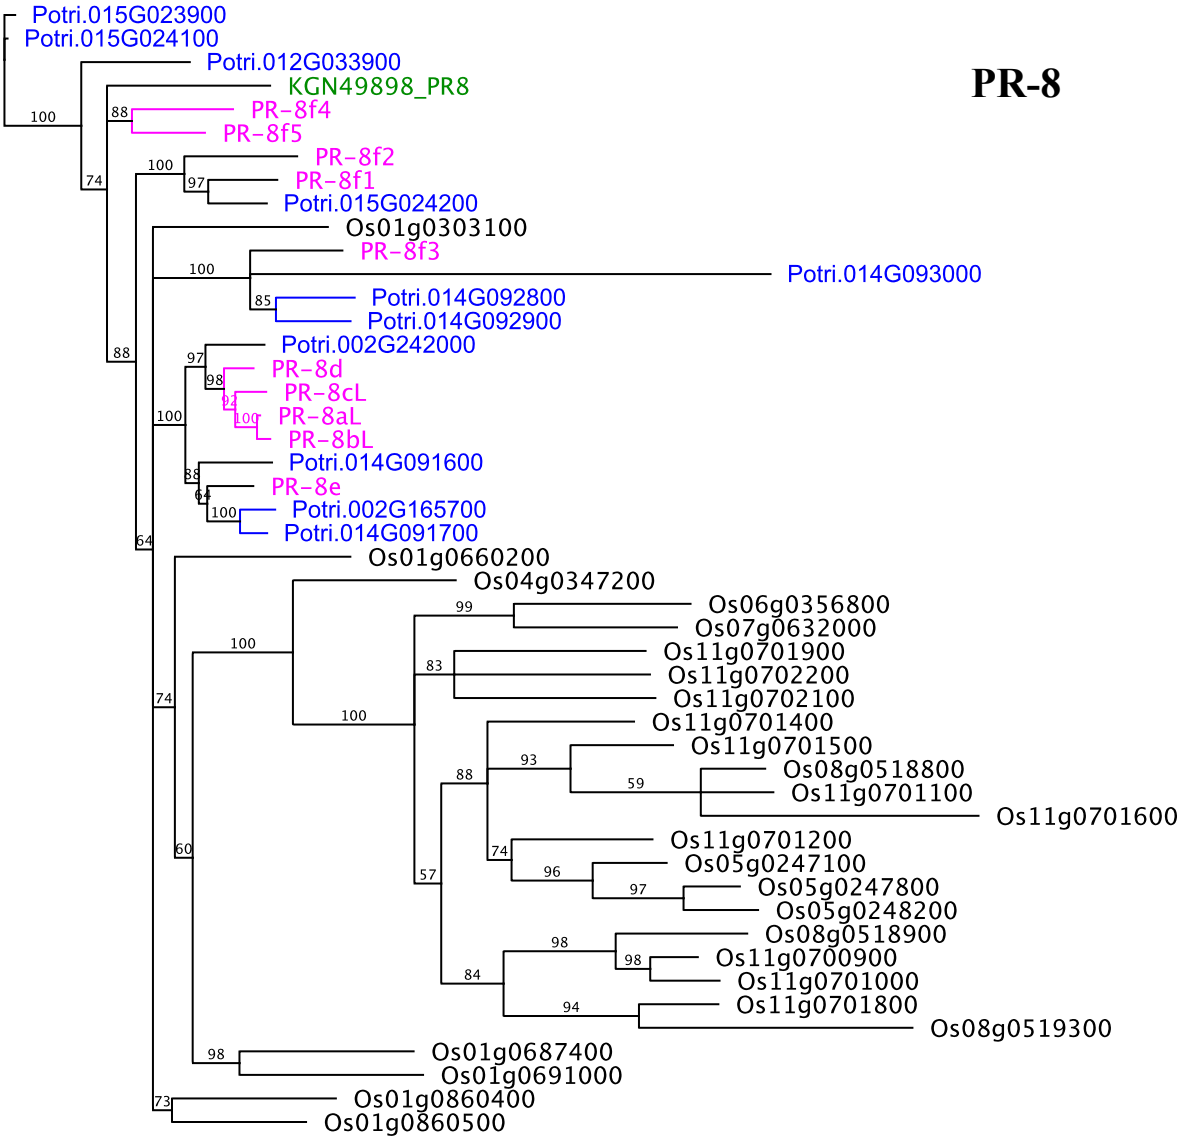

0.2



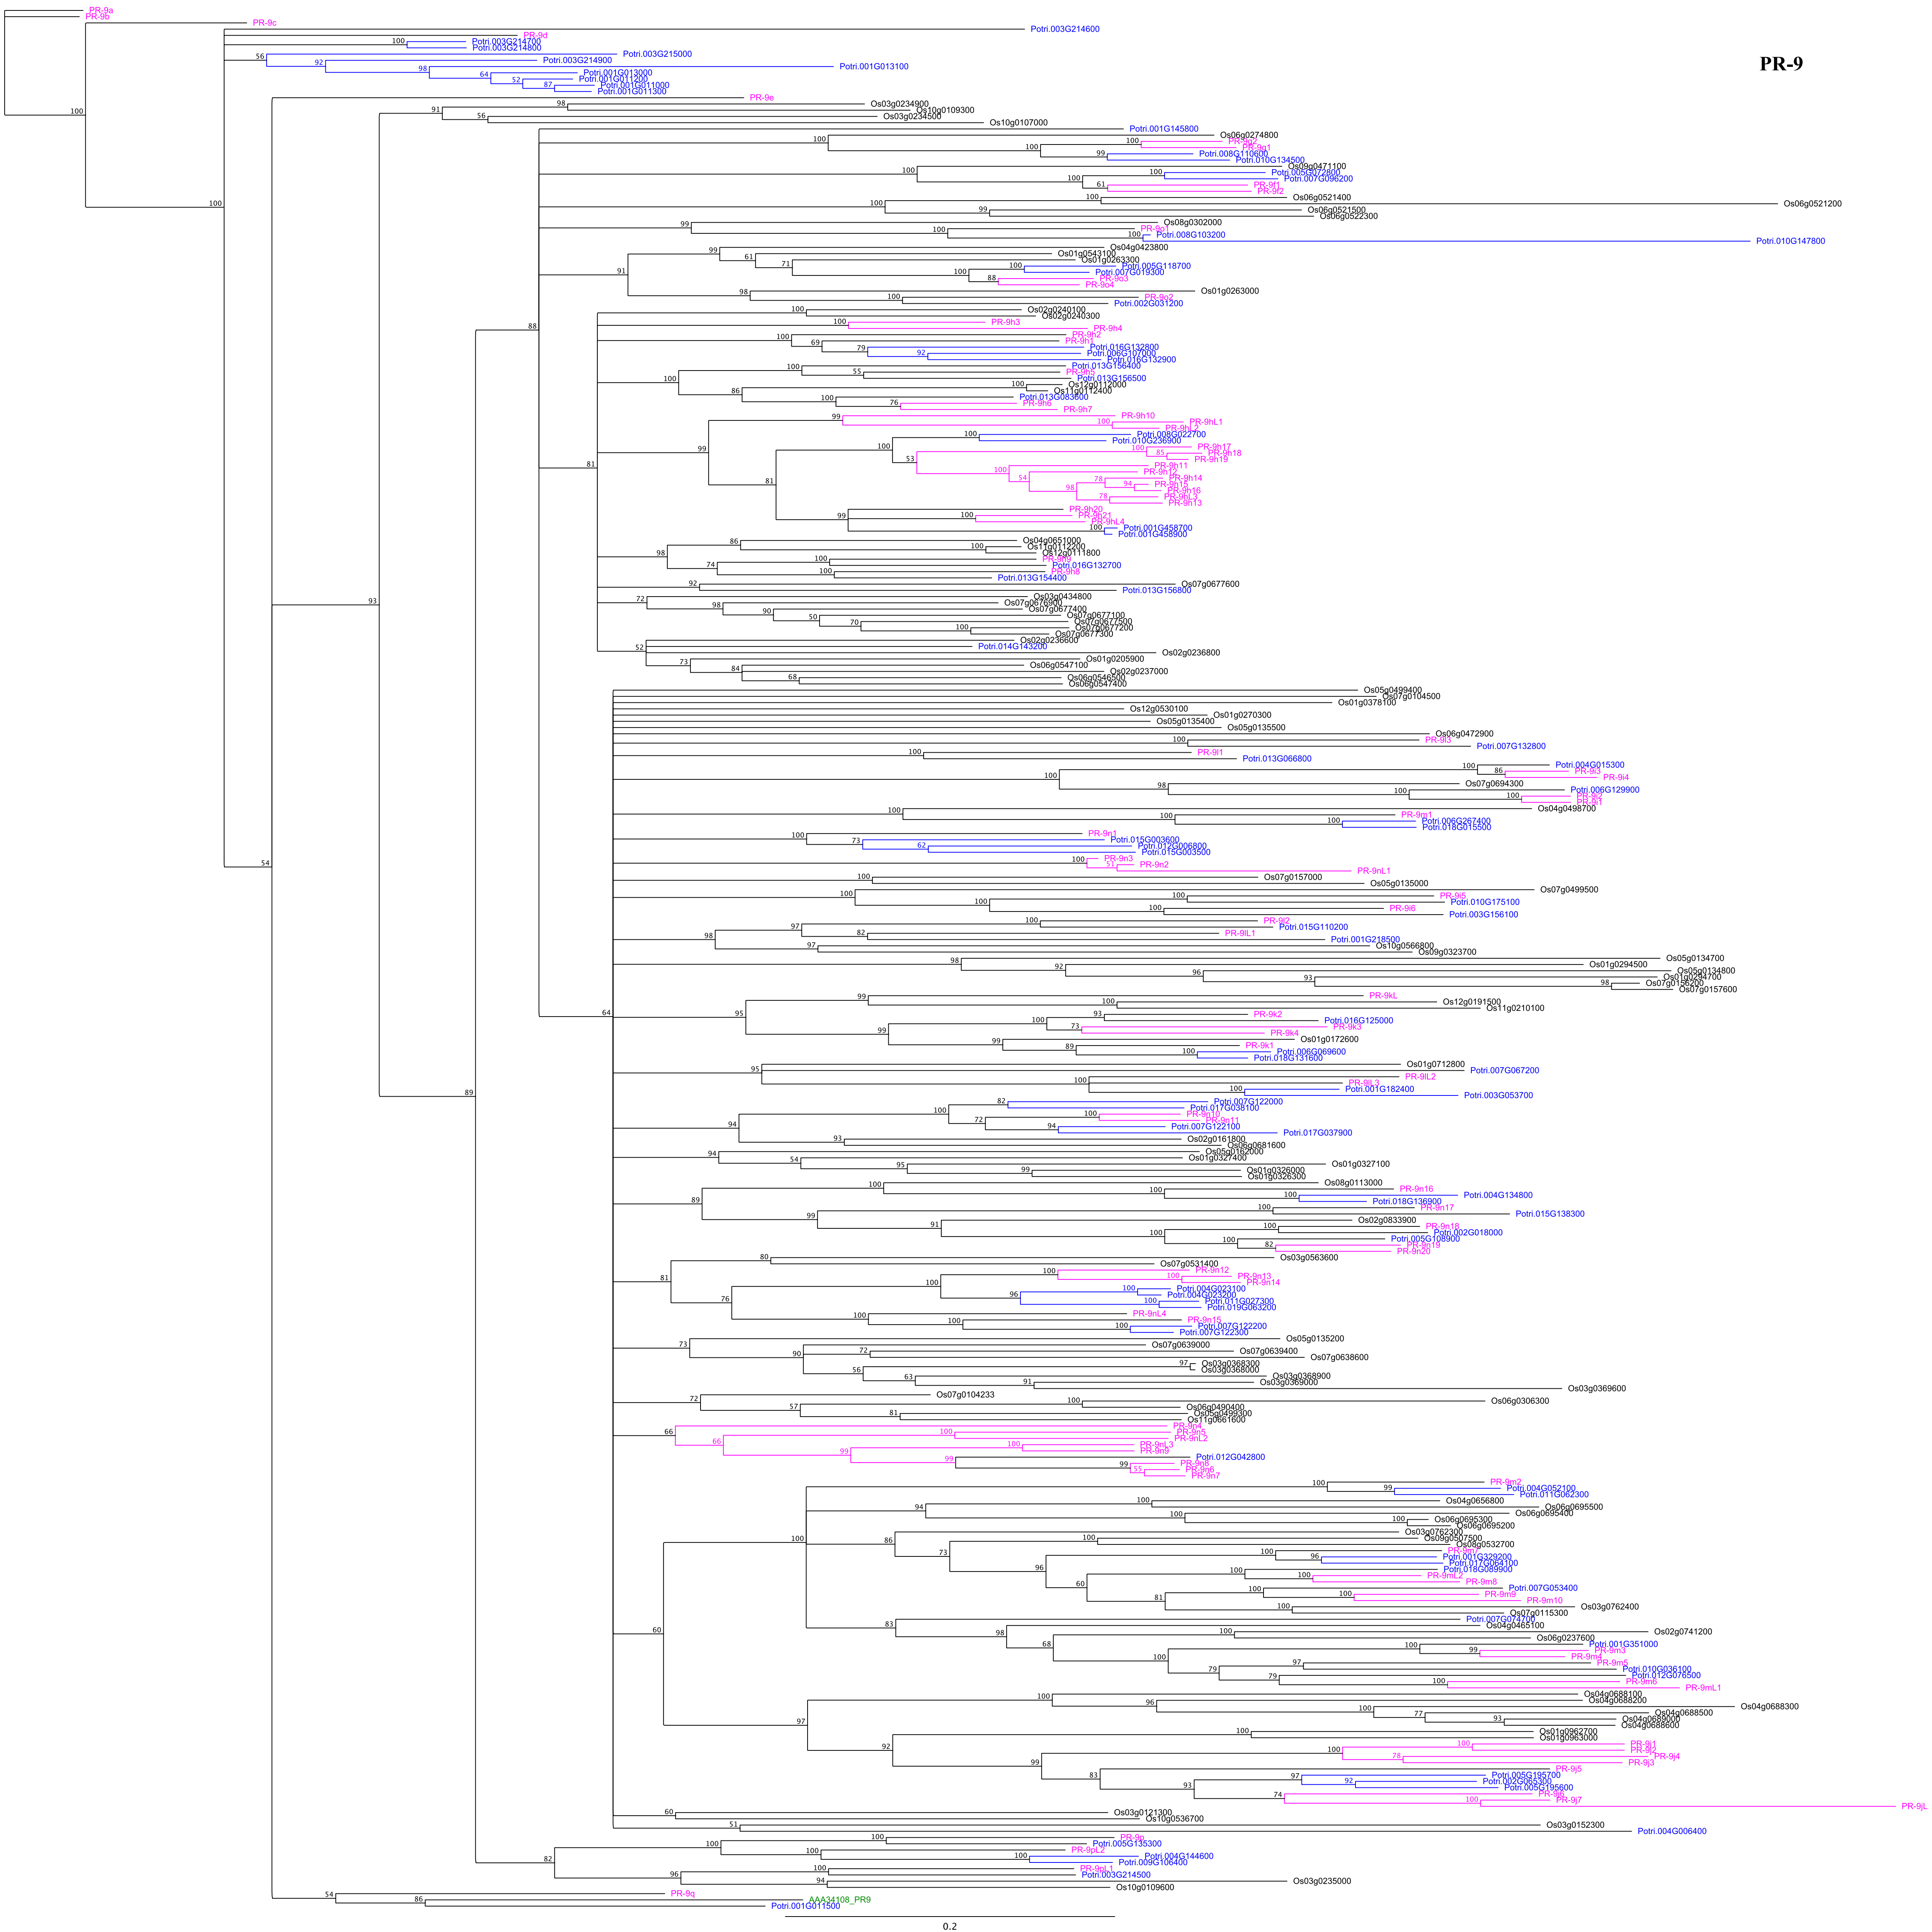

# PR-10

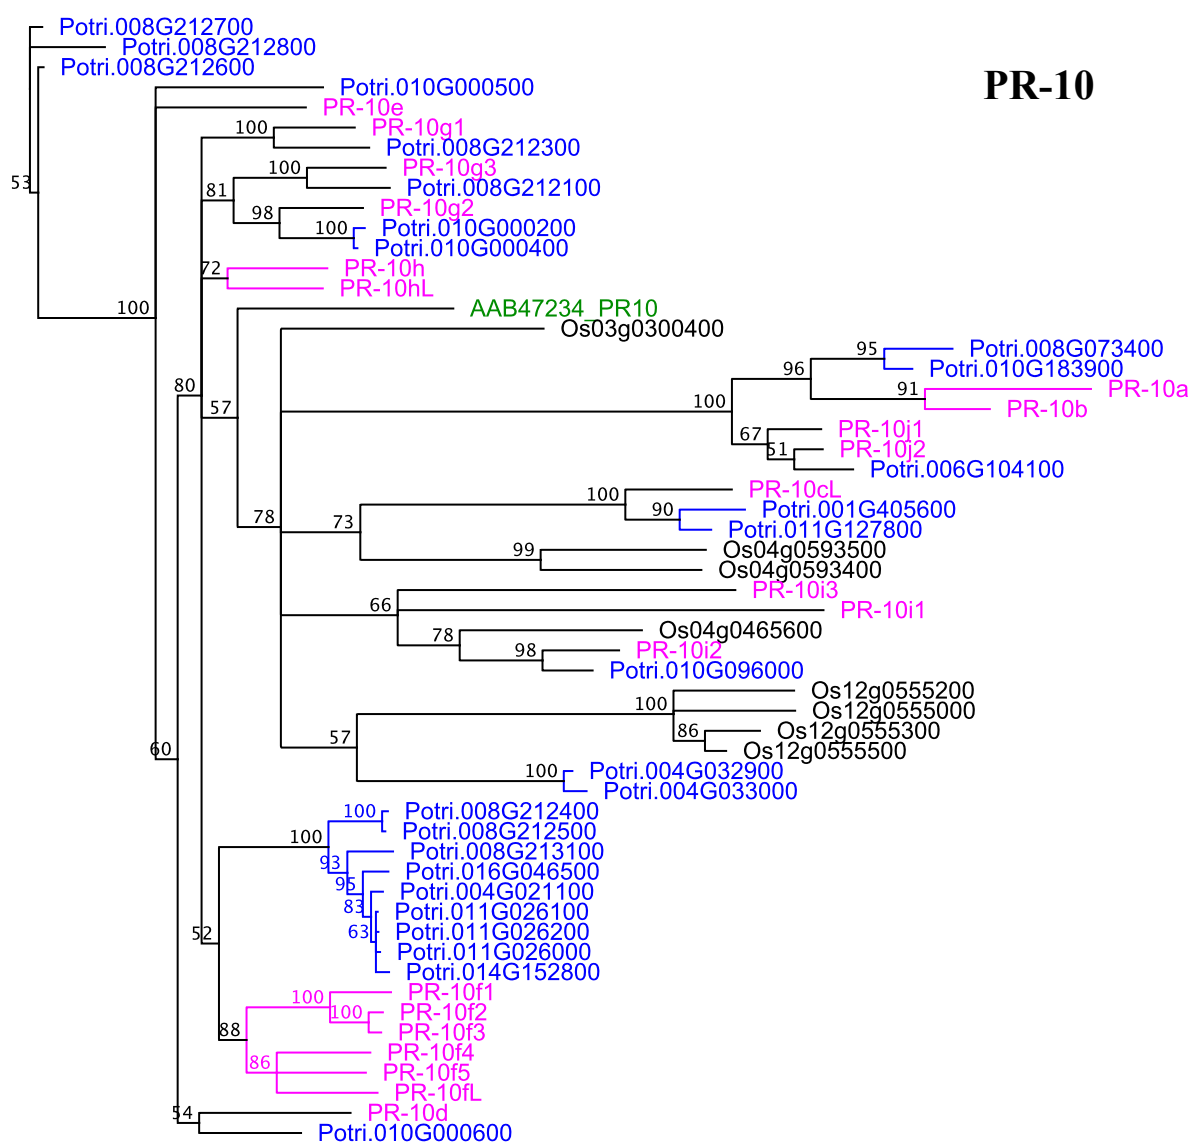

0.3

# PR-11

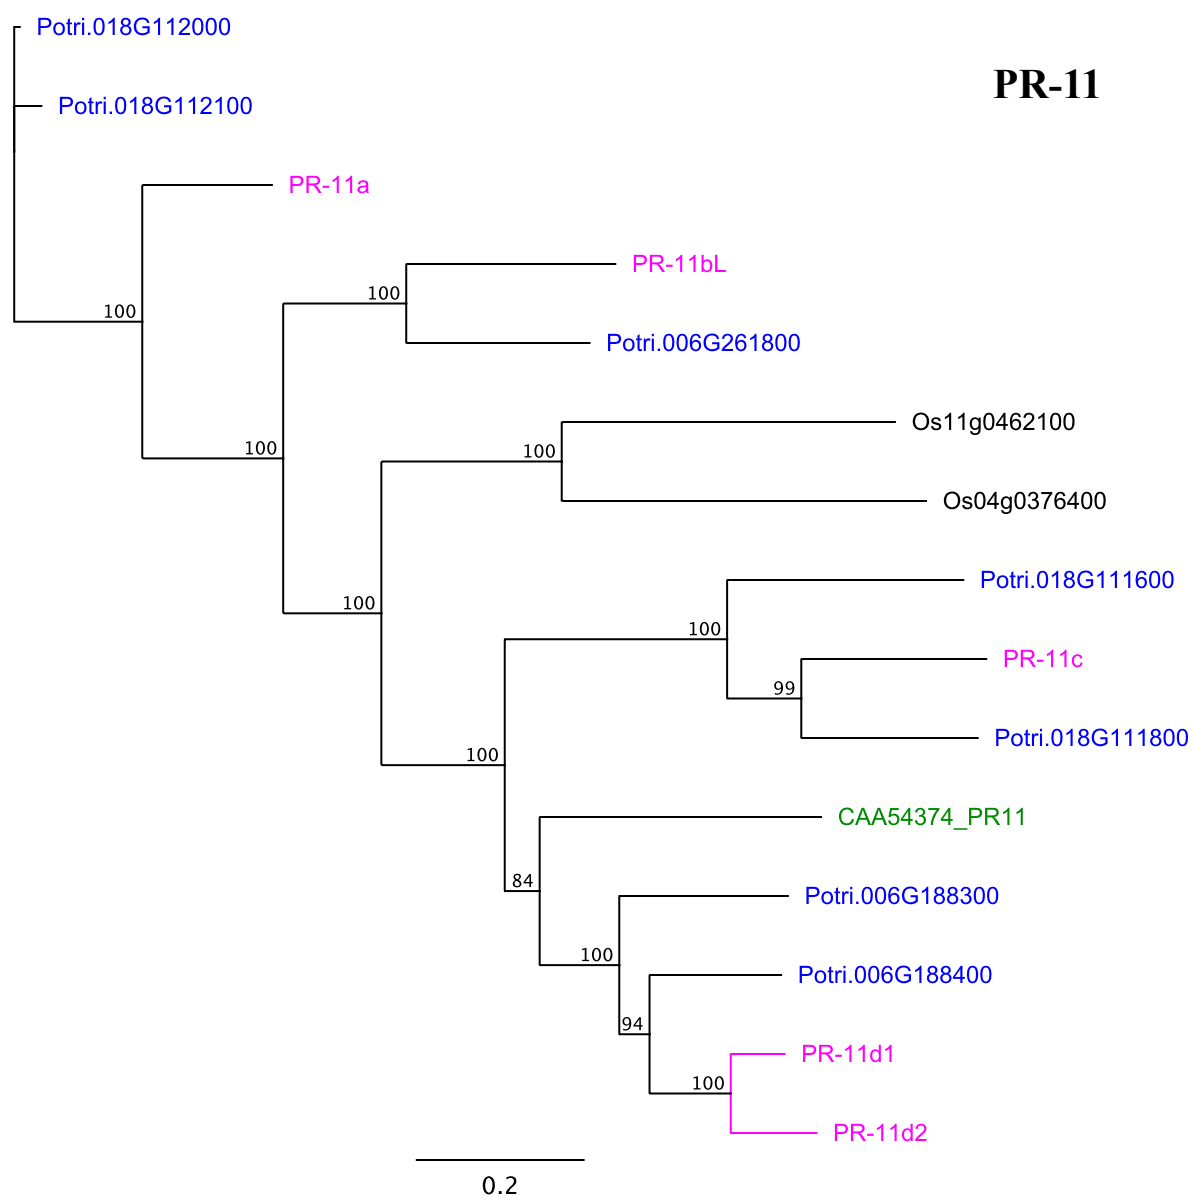

PR-14f  
Potri.012G139700

PR-14

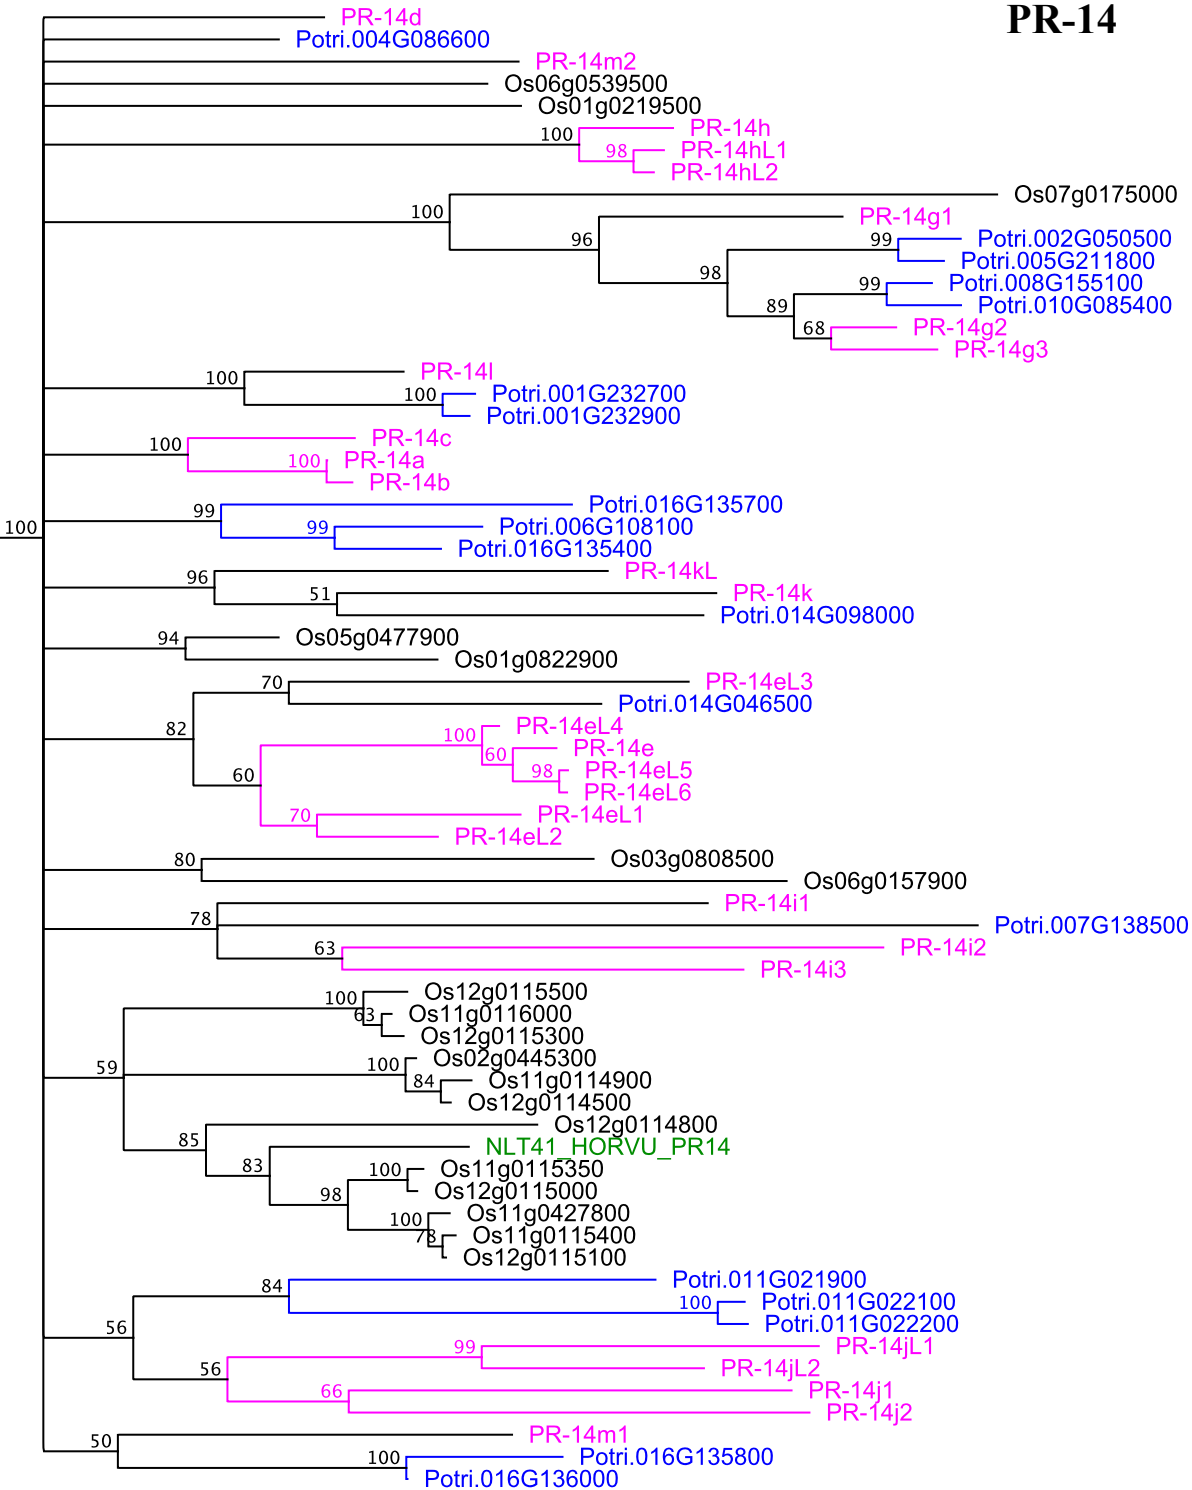

0.2

# PR-15/16

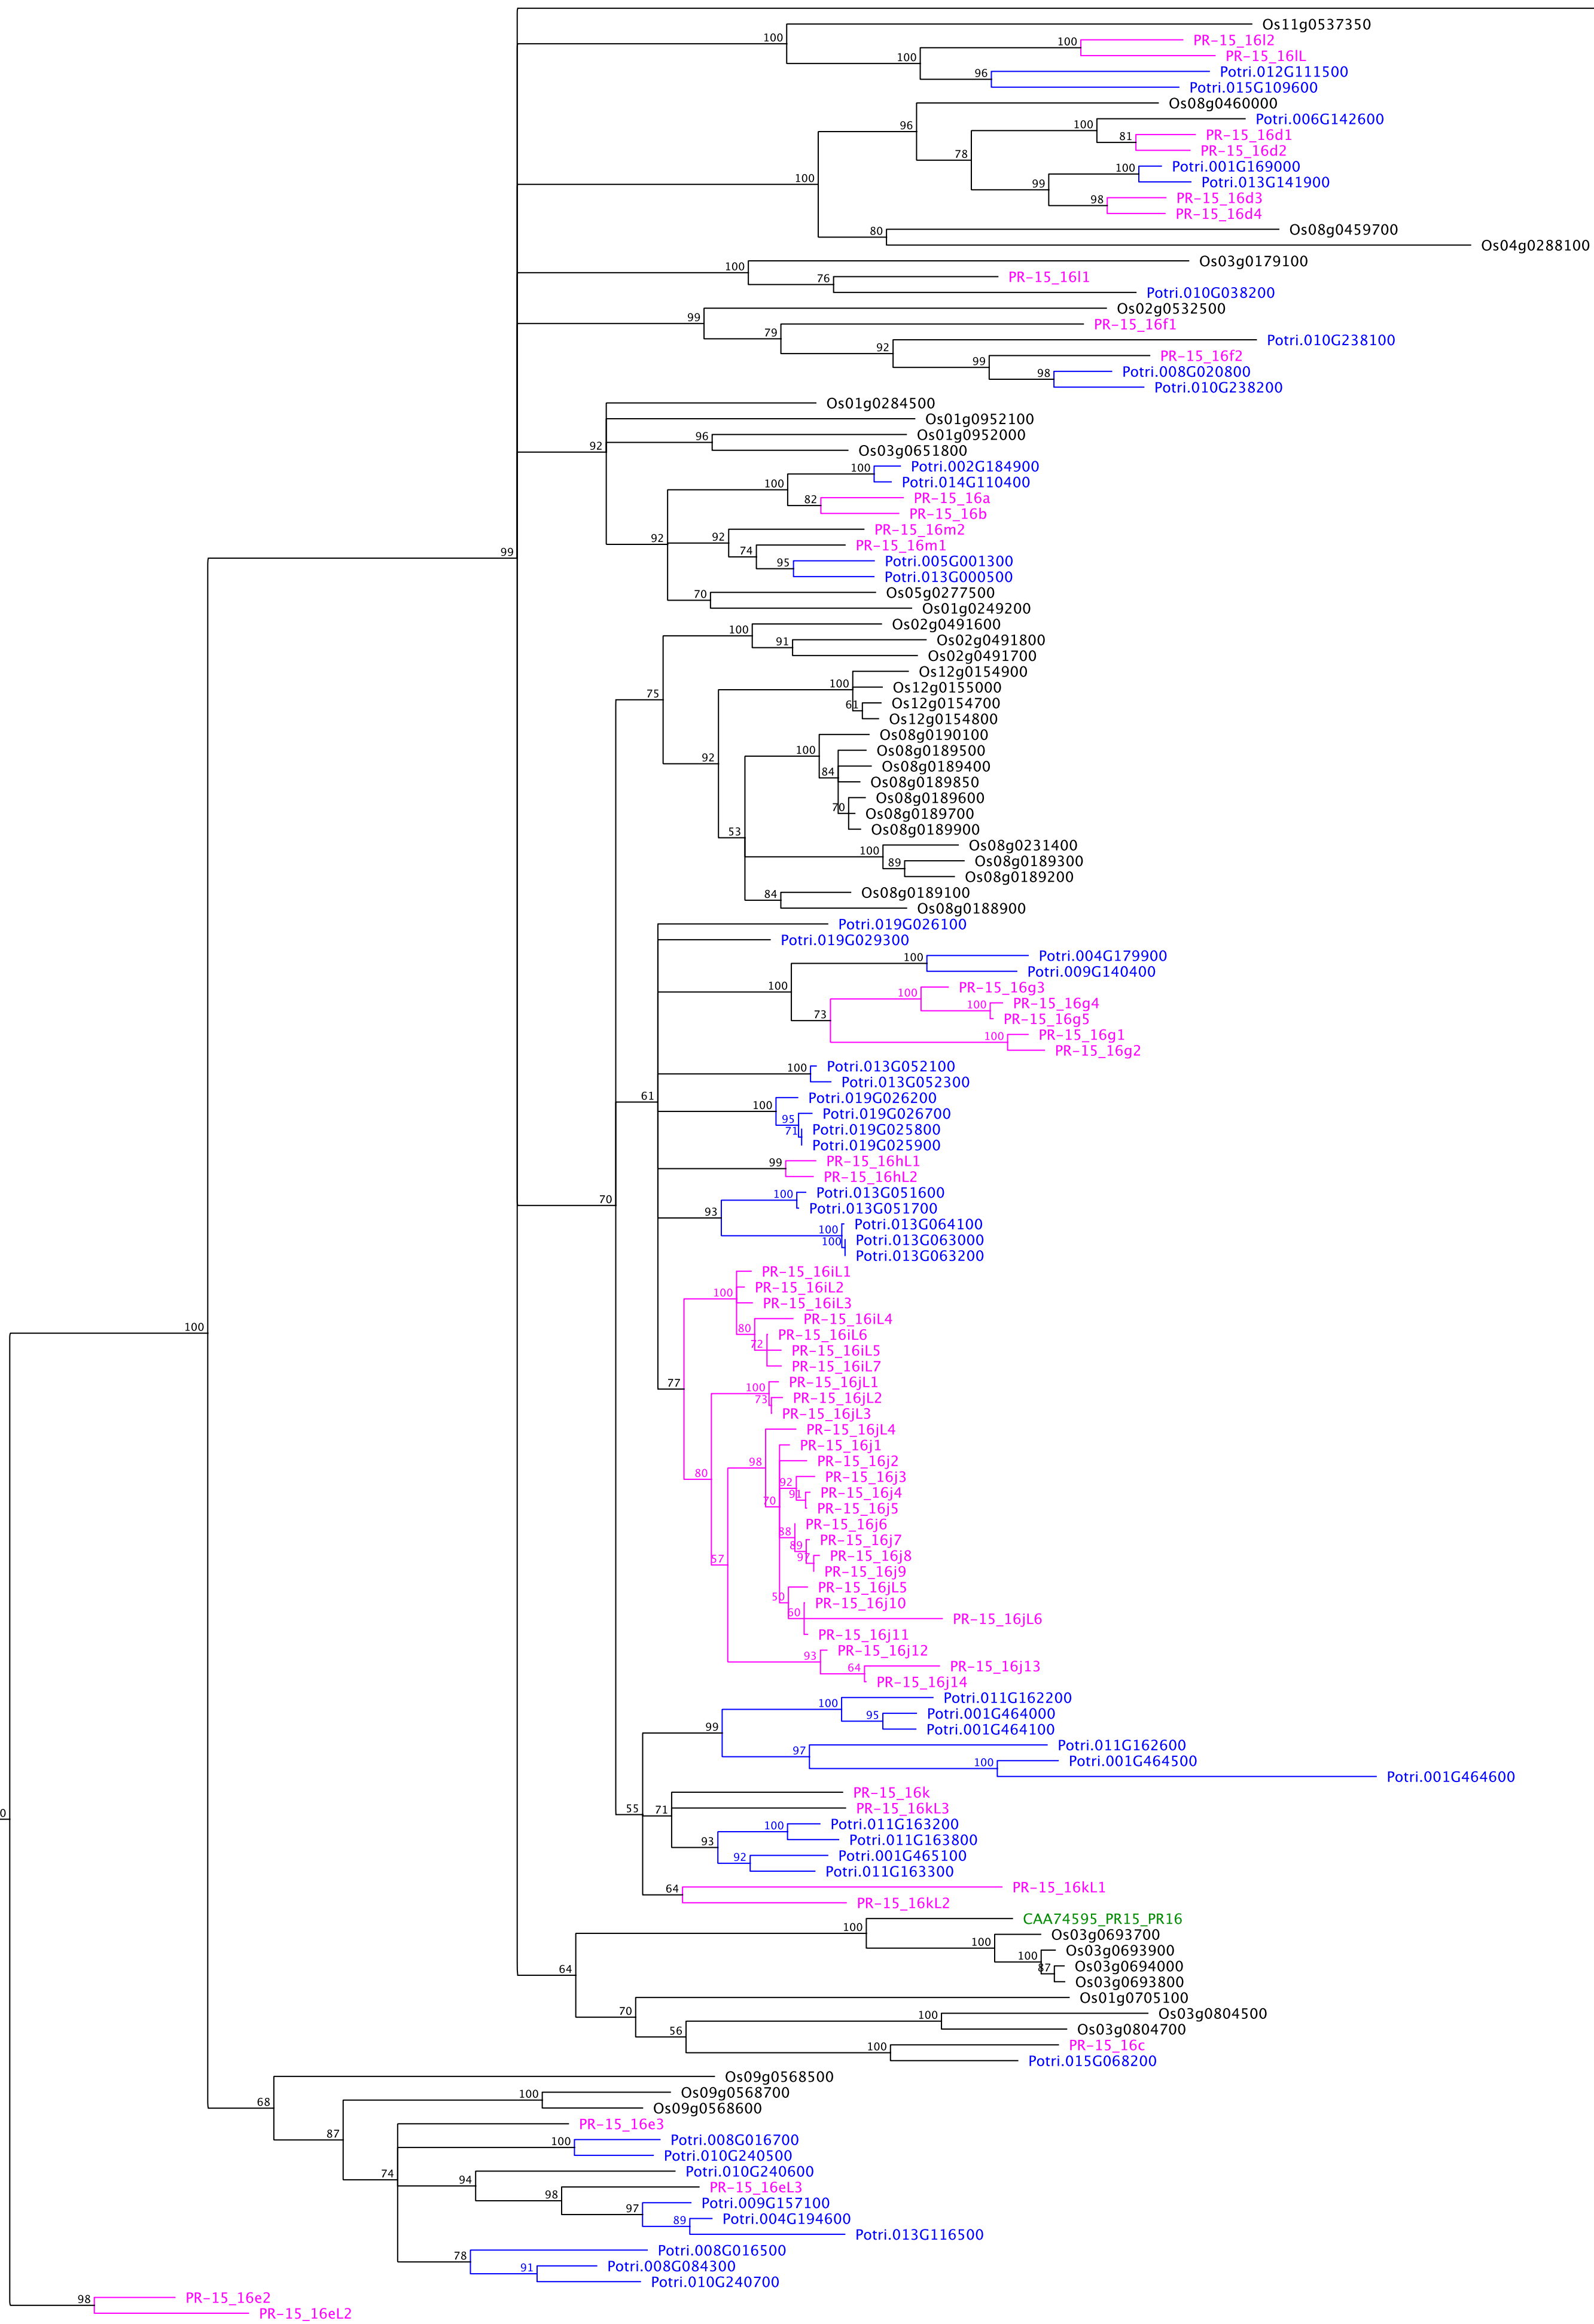

# PR-17

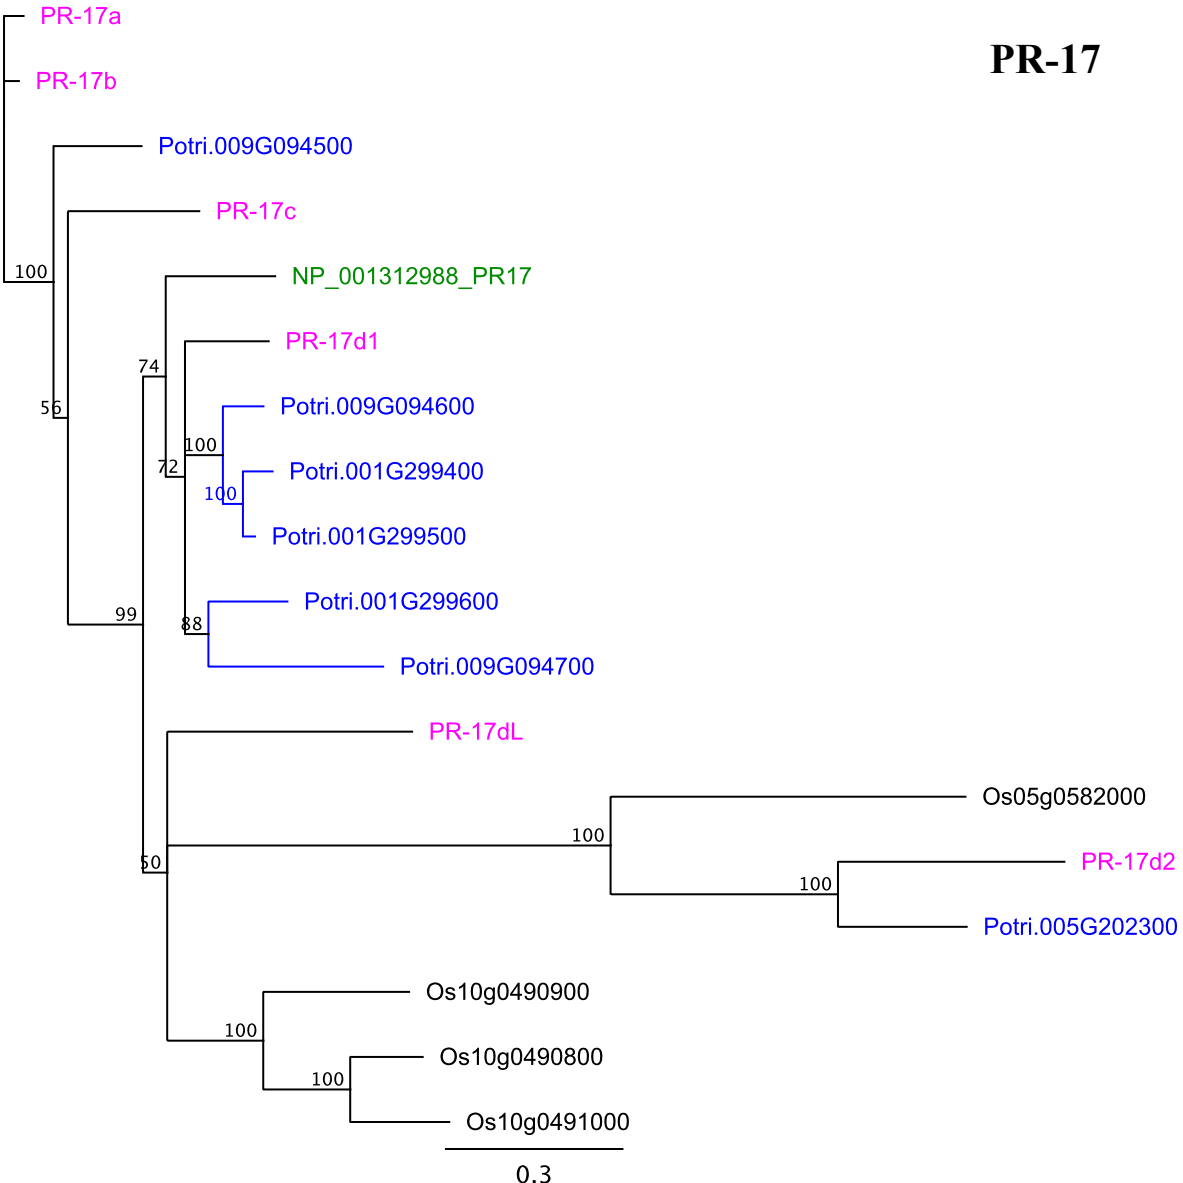

Supplement: 12864_2019_6443_MOESM2_ESM.pdf [file 12864_2019_6443_MOESM2_ESM.pdf]
