# Supplementary material for: Genome-wide analyses of cassava Pathogenesis-related (PR) gene families reveal core transcriptome responses to whitefly infestation, salicylic acid and jasmonic acid
Source: PubMed Central journal article supplement (PMC6990599; doi:10.1186/s12864-019-6443-1), 2020-01-29

**a**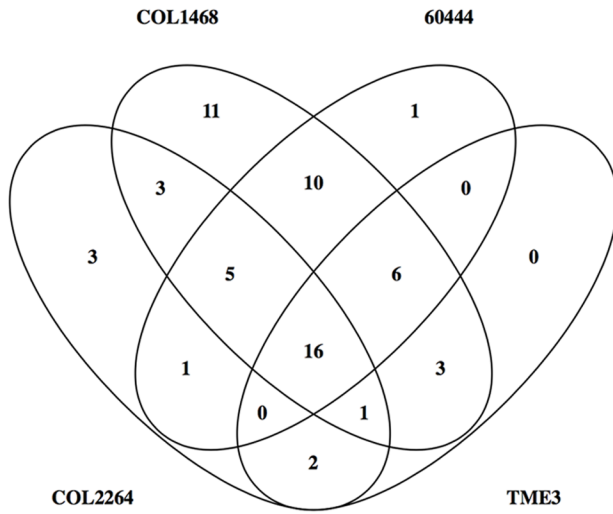**b**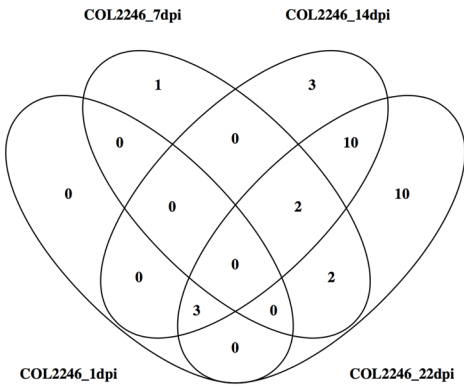**c**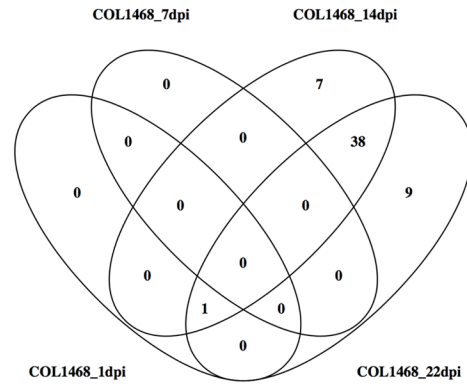**d**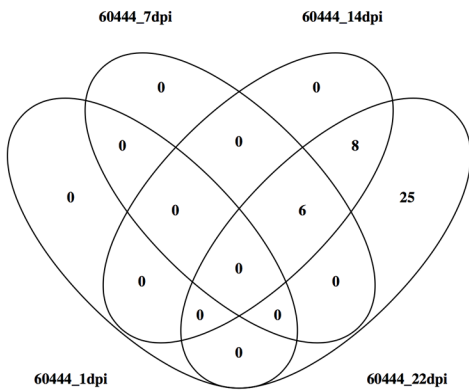**e**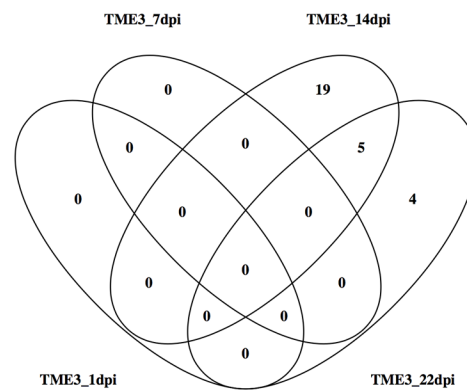

Supplement: 12864_2019_6443_MOESM5_ESM.pdf [file 12864_2019_6443_MOESM5_ESM.pdf]
